## ***The Effect of Tirilazad Mesylate (U74006F) on Cerebral Oxygen Consumption, and Reactivity of Cerebral Blood Flow to Carbon Dioxide in Healthy Volunteers***

Karsten Skovgaard Olsen, M.D.,\* Charlotte Videbaek, M.D.,† Niels Agerlin, M.D.,‡ Martin Krøll, M.D.,§ Torben Bøge-Rasmussen, M.D.,¶ Olaf B. Paulson, M.D., Ph.D.,\*\* Flemming Gjerris, M.D., Ph.D.††

**Background:** The 21-aminosteroids are a series of compounds designed to inhibit lipid peroxidation in the cell, and, as such, may have cerebral protective effects. The current study was performed to evaluate the effect of a 21-aminosteroid, tirilazad mesylate (U74006F), on cerebral blood flow, metabolism, and carbon dioxide reactivity.

**Methods:** Using a double-blind study design, eight volunteers received tirilazad mesylate, and eight others received only vehicle. The cerebral blood flow was measured by single photon emission computerized tomography using  $^{133}\text{Xe}$  inhalation in the resting condition at the beginning of the study and after infusion of tirilazad mesylate (1.5 mg/kg) or vehicle. Cerebral oxygen metabolism was calculated from the cerebral blood flow and the measured cerebral arteriovenous oxygen content difference. After both of the above cerebral blood flow measurements, arterial carbon dioxide tension was decreased by voluntary hyperventilation, and, later, increased by breathing an air/carbon dioxide mixture. The relative changes in cerebral blood flow induced by the  $\text{Pa}_{\text{CO}_2}$  variations were estimated from the changes in the arteriovenous oxygen content difference.

**Results:** Blood pressure, pulse rate, and  $\text{Pa}_{\text{CO}_2}$  were similar before and after the infusion of tirilazad mesylate in both groups, and there was no difference between the groups. The cerebral blood flow and oxygen metabolism did not change after the tirilazad mesylate infusion. The slope of the regres-

sion line of relative change of estimated cerebral blood flow and  $\text{Pa}_{\text{CO}_2}$  (regression coefficients in both groups,  $> 0.90$ ) was unchanged after infusion.

**Conclusions:** Tirilazad mesylate has no effect on cerebral blood flow, cerebral oxygen metabolism, or reactivity of cerebral blood flow to carbon dioxide in healthy volunteers. (Key words: Carbon dioxide, brain: cerebral blood flow; cerebral oxygen consumption; cerebral vascular reactivity. Pharmacology, free radical scavenger: tirilazad mesylate.)

OXYGEN free radicals arise from a number of sources within injured or ischemic tissue.<sup>1,2</sup> These radicals are highly reactive, and can attack cellular constituents. Unsaturated fatty acids comprising much of the phospholipid environment of cell and organelle membranes are particularly susceptible to the effects of oxygen free radicals or peroxidation. The process of peroxidation and the generation of oxygen radicals have been reviewed extensively.<sup>1,2</sup>

The 21-aminosteroids are a new series of compounds designed to inhibit lipid peroxidation in the cell. U74006F (tirilazad mesylate), the first member of the series of 21-aminosteroids available for clinical testing, inhibits lipid peroxidation by scavenging lipid free radicals.<sup>3</sup> In addition, it has a stabilizing effect on the cell membrane, by blocking the release of free arachidonic acid from the injured cell membrane.<sup>4</sup> Thus, tirilazad mesylate may have an important role in the treatment of cerebral ischemia and vasospasm. Results from animal studies have been promising,<sup>5-7</sup> but a place for these drugs in the treatment of human disease awaits outcome trials that are currently in progress.

Because tirilazad mesylate is a potentially useful drug in neurologic intensive care, it is important to know its effect on cerebral blood flow (CBF), cerebral oxygen metabolism ( $\text{CMR}_{\text{O}_2}$ ), and reactivity of cerebral blood flow to changes in arterial carbon dioxide tension (carbon dioxide reactivity).

\* Senior Registrar in Anesthesia, Department of Anesthesia.

† Research Fellow, Department of Neurology.

‡ Research Fellow, Department of Neurosurgery.

§ Resident, Department of Neurosurgery.

¶ Senior Registrar in Neurosurgery, Department of Neurosurgery.

\*\* Professor and Chairman, Department of Neurology.

†† Professor and Chairman, Department of Neurosurgery.

Received from the Departments of Anesthesia, Neurology, and Neurosurgery, Rigshospitalet, University of Copenhagen, Copenhagen, Denmark. Accepted for publication May 25, 1993. Supported by the Danish Medical Research Council and the Lundbeck Foundation.

Address reprint requests to Dr. Olsen: Department of Anesthesia, Rigshospitalet, Blegdamsvej 9, DK-2100, Copenhagen, Denmark.

## Materials and Methods

Sixteen healthy male volunteers were included in the study, which was approved by the Scientific Ethical Committee. Informed consent, according to the Helsinki II declaration, was obtained from each participant. Eight volunteers, with a median age of 23 yr (range 20–30 yr) were assigned to group A (receiving tirilazad mesylate), and eight others, with a median age of 25 yr (range 20–31 yr), were assigned to group B (receiving vehicle only). One volunteer in group A was excluded because of malfunction of the jugular catheter. The volunteers fasted and did not smoke for at least 12 h before the study.

Before the volunteers were included in the study, it was ensured that their hemoglobin, hematocrit, leukocytes and differential count, thrombocytes, creatinine, glucose, albumin, protein, creatine kinase, bilirubin, basic phosphatase, glutamyl-transferase, alanin-aminotransferase, lactat-dehydrogenase, carbon dioxide, calcium, phosphate, sodium, potassium, and ECG were normal, and that their urine was free of protein, glucose, ketones, and hemoglobin.

### Study Design

The study was prospective, randomized, and double blind. Blood and urine samples were, again, collected for the same tests mentioned above, after which three sets of arteriovenous blood samples were drawn (baseline), followed by an absolute regional CBF measurement using  $^{133}\text{Xe}$  inhalation. During this measurement, one additional set of blood samples was collected. Then, the arterial carbon dioxide tension ( $\text{Pa}_{\text{CO}_2}$ ) was decreased by voluntary hyperventilation, and, later, was increased by breathing an air/carbon dioxide mixture. The relative changes in CBF, induced by the  $\text{Pa}_{\text{CO}_2}$  variations, were estimated from changes in the cerebral arteriovenous oxygen content difference ( $\text{AVDO}_2$ ). After a pause of 50 min, group A received tirilazad mesylate, and group B received vehicle. When the infusion was finished, blood sampling, CBF measurement, and carbon dioxide manipulations were repeated.

### Catheterization, Monitoring, and $\text{AVDO}_2$ Measurement

Under local anesthesia, a plastic cannula was introduced into the left radial artery, and a catheter was placed in the right internal jugular vein, with the tip in the jugular bulb. The correct position of the catheter

was tested by injecting isotonic saline into the catheter, and confirmed by a typical murmur in the subject's ear.<sup>8</sup> An intravenous catheter was placed in the brachial vein for the infusion of tirilazad mesylate or vehicle.

The mean arterial blood pressure (MABP) was continuously invasively measured *via* the cannula in the radial artery. During the study, ECG and pulse rate were also monitored.

All sets of blood samples consisted of one arterial and two venous blood samples (mean value used for calculations) that were drawn simultaneously from the radial artery catheter and jugular catheter, respectively. The blood was analyzed immediately for hemoglobin and hemoglobin saturation (OSM3 Hemooximeter, Radiometer, Copenhagen), oxygen tension, carbon dioxide tension, and pH (ABL3, Radiometer, Copenhagen).

### Measurement of Absolute Regional CBF

During CBF measurements, the volunteers rested in quiet surroundings in the supine position and with eyes closed.  $^{133}\text{Xe}$  inhalation and single photon emission computerized tomography (SPECT) (Tomomatic 64; Medimatic, Hellerup, Denmark) of the brain were used for measurement of regional CBF. For the estimate of arterial  $^{133}\text{Xe}$  input to the brain, a detector over the apex of the right lung was used. The scanner yielded three parallel slices at 1, 5, and 9 cm above the orbitomeatal (OM) plane.<sup>9,10</sup> The global CBF was estimated from the OM 5 plane as the mean of all brain pixel values.<sup>11</sup> Regional CBF was estimated by a standardized set of symmetrically placed regions of interest. A side-to-side asymmetry ratio of less than 10% was considered normal.<sup>12</sup>

The second CBF (SPECT) was corrected for any difference of  $\text{Pa}_{\text{CO}_2}$  between the first and second CBF measurement using the carbon dioxide reactivity for each volunteer (calculated from a semilogarithmic plot of  $1/\text{AVDO}_2$  and  $\text{Pa}_{\text{CO}_2}$  [see below]).

### Calculation of $\text{CMR}_{\text{O}_2}$

During the CBF measurement (SPECT), one set of blood samples was drawn to determine  $\text{AVDO}_2$  and  $\text{Pa}_{\text{CO}_2}$ . The  $\text{AVDO}_2$  was calculated as the difference between arterial and venous oxygen content ( $\text{O}_2$  saturation  $\times 1.34 \times$  hemoglobin concentration [g/100 ml] +  $\text{O}_2$  tension (mmHg)  $\times 0.003$  for arterial and venous blood, respectively).  $\text{CMR}_{\text{O}_2}$  was calculated as  $\text{CBF} \times \text{AVDO}_2$ .

### Calculation of the Carbon Dioxide Reactivity

Initially, a baseline  $\text{AVDO}_2$  and  $\text{Pa}_{\text{CO}_2}$  were calculated

**Table 1. Baseline Mean Arterial Blood Pressure (MABP), Heart Rate (HR), and Arterial Carbon Dioxide Tension ( $P_{aCO_2}$ ) before and after Infusion of Tirilazad Mesylate (Group A) or Vehicle (Group B)**

|                    | Group A<br>(n = 7) | Group B<br>(n = 8) |
|--------------------|--------------------|--------------------|
| Before infusion    |                    |                    |
| MABP (mmHg)        | 91 (79–100)        | 90 (81–103)        |
| HR (beats/min)     | 65 (62–86)         | 68 (53–80)         |
| $P_{aCO_2}$ (mmHg) | 38 (33–41)         | 40 (32–46)         |
| After infusion     |                    |                    |
| MABP (mmHg)        | 87 (79–103)        | 90 (84–106)        |
| HR (beats/min)     | 71 (57–77)         | 63 (55–76)         |
| $P_{aCO_2}$ (mmHg) | 38 (34–40)         | 40 (35–45)         |

Values are median (range). There was no statistically significant difference between values before and after infusion or between groups.

as the mean value of three sets of blood samples, and were used as reference levels for the following carbon dioxide manipulations. The volunteers were asked to hyperventilate slightly for 3 min, and maximally for another 3 min. Blood samples for determination of  $AVDO_2$  were drawn at 1.5, 3, 4.5, and 6 min after the start of the hyperventilation. The volunteer rested for 10 min, before starting to breathe air with 4%  $CO_2$  for 3 min, and air with 7%  $CO_2$  for another 3 min, to increase  $P_{aCO_2}$ . For determination of  $AVDO_2$  values during increased  $P_{aCO_2}$  levels, blood samples were drawn at 1.5, 3, 4.5, and 6 min after the start of the carbon dioxide breathing.

Relative changes of global CBF induced by carbon dioxide manipulations were estimated by the changes in the  $AVDO_2$ .<sup>13</sup> A relative CBF value ( $1/AVDO_2$ ) was calculated from baseline  $AVDO_2$ , which was expressed as 100%. Assuming a constant  $CMR_{O_2}$  during the  $P_{aCO_2}$  manipulations (see discussion), determination of changes in  $1/AVDO_2$  gives a good estimate of changes in global CBF (according to  $CBF = k \times 1/AVDO_2$ ).<sup>14</sup>

In each individual, the correlation of  $1/AVDO_2$  (%) and  $\log 1/AVDO_2$  with  $P_{aCO_2}$  were analyzed using the Pearson product-moment correlation coefficient ( $r$ ) by linear regression. The slope of the regression line (*i.e.*, the percentage change of estimated CBF [ $1/AVDO_2$ ] per mmHg change of  $P_{aCO_2}$ ), was used as the carbon dioxide reactivity.

#### *Tirilazad Mesylate/Vehicle*

Group A received, over 10 min, 1.5 mg/kg tirilazad mesylate (Upjohn Company, Denmark). The concen-

tration of tirilazad mesylate, which was dissolved in a citrate solution, was 0.75 mg/ml. The volunteers in group B received only the citrate vehicle. The tirilazad mesylate solution or vehicle were delivered in sealed bottles marked only with the randomization code.

#### *Statistics*

The values of CBF (SPECT),  $CMR_{O_2}$ , and carbon dioxide reactivity, before and after infusion of tirilazad mesylate, respectively, were compared by the nonparametric Wilcoxon rank-sum test for paired sample observations. To evaluate differences between groups (A and B), the Wilcoxon–Mann–Whitney test for two independent groups was used. Differences were considered statistically significant when  $P < 0.05$ . The results are presented as medians, with the range in brackets.

#### **Results**

There was no significant difference between the groups in regard to sex or age. The results of the study are summarized in the tables.

#### *Group A (Tirilazad Mesylate)*

The MABP, pulse rate, and  $P_{aCO_2}$  did not change after tirilazad mesylate infusion (table 1). The CBF (measured by SPECT) and  $CMR_{O_2}$  were unchanged after the infusion (table 2). The carbon dioxide reactivity (calculated from the semilogarithmic plot of  $1/AVDO_2$  vs.  $P_{aCO_2}$ , as this had a higher regression coefficient than the linear plot, see below) for each volunteer was used

**Table 2. Cerebral Blood Flow (CBF) ( $ml \cdot 100 g^{-1} \cdot min^{-1}$ ) and Cerebral Oxygen Metabolism ( $CMR_{O_2}$ ) ( $ml \cdot 100 g^{-1} \cdot min^{-1}$ ) before and after Infusion of Tirilazad Mesylate (Group A) and Vehicle (Group B)**

|                 | Group A<br>(n = 7) | Group B<br>(n = 8) |
|-----------------|--------------------|--------------------|
| Before infusion |                    |                    |
| CBF             | 62 (44–79)         | 54 (45–68)         |
| $CMR_{O_2}$     | 4.4 (3.3–5.2)      | 3.7 (3.2–4.8)      |
| After infusion  |                    |                    |
| CBF             | 59 (50–67)         | 51 (42–71)         |
| $CBF_{cor}$     | 59 (40–69)         | 53 (34–74)         |
| $CMR_{O_2}$     | 3.5 (3.1–5.2)      | 3.7 (2.5–4.8)      |

Values are median (range). There was no statistically significant difference between values before and after infusion or between groups.

$CBF_{cor}$  = the second CBF corrected for minor differences in  $P_{aCO_2}$  between the first and second CBF determination.

TIRILAZAD MESYLATE AND CBF,  $\text{CMR}_{\text{O}_2}$ , OR  $\text{CO}_2$  REACTIVITY

to correct the second CBF (SPECT) for any difference of  $\text{Pa}_{\text{CO}_2}$  from the first CBF measurement (table 2). A statistically significant correlation of  $1/\text{AVDO}_2$  and  $\text{Pa}_{\text{CO}_2}$  was obtained over the entire range of  $\text{Pa}_{\text{CO}_2}$  values, both before and after the infusion, whether using a linear or semilogarithmic plot (table 3). Figure 1 shows the regression lines calculated from values before and after tirilazad mesylate infusion, respectively. One person in this group had pain at the site of infusion, and it was necessary to reduce the infusion rate.

#### Group B (Vehicle)

As in group A, MABP, pulse rate, and  $\text{Pa}_{\text{CO}_2}$  were unchanged after infusion of the citrate vehicle (table 1). Furthermore, CBF and  $\text{CMR}_{\text{O}_2}$  were unchanged after the infusion (table 2). A statistically significant correlation of  $1/\text{AVDO}_2$  and  $\text{Pa}_{\text{CO}_2}$  was also obtained in this group. The carbon dioxide reactivity was not changed by the infusion of vehicle (table 3). Figure 2 shows the regression lines calculated from values before and after placebo infusion, respectively. One person in this group had some pain and edema at the site of infusion.

#### Comparison of Group A and B

The MABP, pulse rate, and  $\text{Pa}_{\text{CO}_2}$  were not different in the two groups. There was no statistically significant difference between group A and B in regard to CBF,  $\text{CMR}_{\text{O}_2}$ , or the carbon dioxide reactivity before and after the tirilazad mesylate or vehicle infusion, respectively.

The semilogarithmic plots yielded the best fit to the individual carbon dioxide reactivity curves, the median regression coefficient being between 0.95 and 0.97 in

**Table 3. The Cerebrovascular Carbon Dioxide Reactivity Expressed as Percent Change in Cerebral Blood Flow (Estimated from Changes in  $\text{AVDO}_2$ ) per 1 mmHg Change  $\text{Pa}_{\text{CO}_2}$**

|                    | Group A<br>(n = 7) | Group B<br>(n = 8) |
|--------------------|--------------------|--------------------|
| Before infusion    |                    |                    |
| CO <sub>2lin</sub> | 5.2 (3.7–8.9)      | 4.8 (4.4–6.2)      |
| CO <sub>2log</sub> | 5.0 (4.6–6.2)      | 5.2 (4.6–5.7)      |
| After infusion     |                    |                    |
| CO <sub>2lin</sub> | 5.2 (4.1–6.4)      | 5.0 (4.1–9.1)      |
| CO <sub>2log</sub> | 4.8 (4.1–5.7)      | 5.2 (4.6–6.8)      |

Values are median (range). There was no statistically significant difference between values before and after infusion or between groups.

CO<sub>2lin</sub> = the median value of linear plots of CBF versus  $\text{Pa}_{\text{CO}_2}$ ; CO<sub>2log</sub> = the median value of the semilogarithmic plots of CBF versus  $\text{Pa}_{\text{CO}_2}$ .

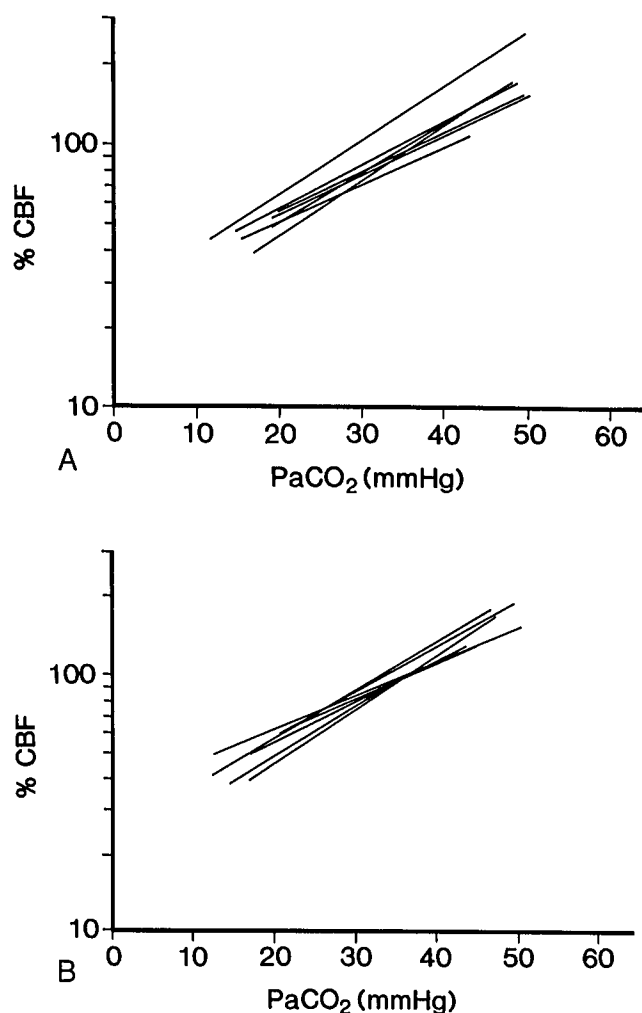

**Fig. 1. Regression lines (semilogarithmic plot) of the estimated relative cerebral blood flow (CBF) versus arterial carbon dioxide tension ( $\text{Pa}_{\text{CO}_2}$ ) in group A before (A) and after tirilazad mesylate infusion (B).**

the two groups before and after the infusion. The linear plots, however, were almost as good, the median regression coefficient being between 0.90 and 0.93.

The median value of the lowest  $\text{Pa}_{\text{CO}_2}$  values measured was 17 mmHg before and after infusion in both groups. The median value of the highest  $\text{Pa}_{\text{CO}_2}$  was 50 mmHg before, and 47 mmHg after, tirilazad mesylate, and 55 mmHg before, and 52 mmHg after, vehicle. The range of the  $\text{Pa}_{\text{CO}_2}$  values for the individual volunteers can be read from figures 1 and 2.

No changes in hematology, blood chemistry, or urine analysis followed the administration of tirilazad mesylate.

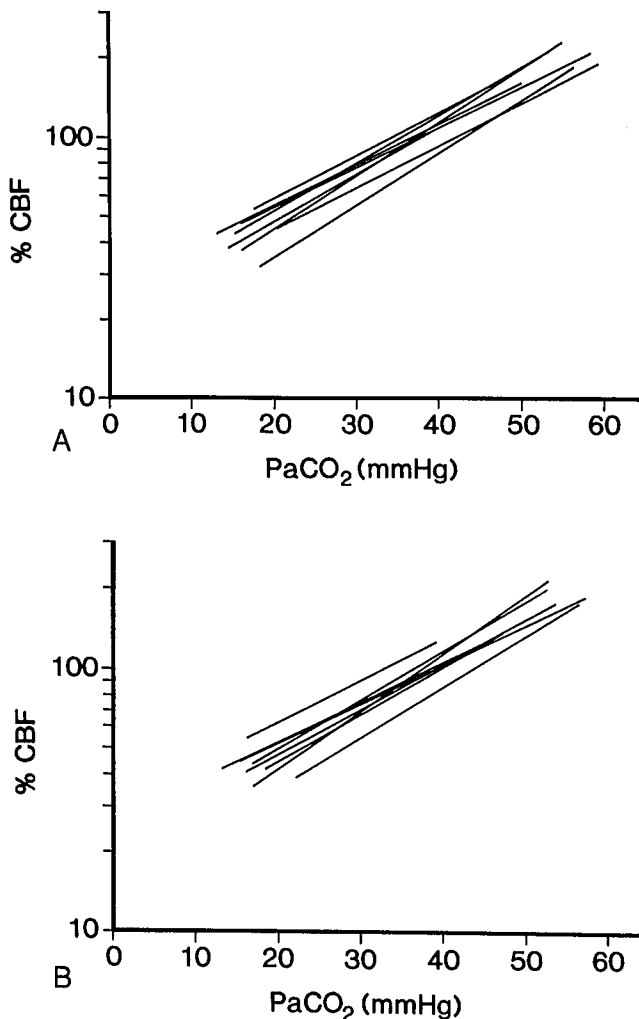

Fig. 2. Regression lines (semilogarithmic plot) of the estimated relative cerebral blood flow (CBF) versus arterial carbon dioxide tension ( $P_{aCO_2}$ ) in group B before (A) and after vehicle (B).

## Discussion

The method of estimating changes in global CBF from changes in  $AVDO_2$ , assuming a constant cerebral metabolism, is well established.<sup>14,15</sup> The validity of the  $AVDO_2$  method used in the current study requires that oxygen metabolism is constant during manipulations of the arterial carbon dioxide tension. This condition

seems to be fulfilled, because several authors found  $CMR_{O_2}$  unaltered by voluntary hyperventilation.<sup>16-19</sup> Studies in awake<sup>17,20</sup> or anesthetized humans<sup>21</sup> showed that increases in  $P_{aCO_2}$  to 45–60 mmHg are accompanied by increases in CBF at an unchanged  $CMR_{O_2}$ , as discussed by Siesjö.<sup>22</sup> In the current study, neither  $CMR_{O_2}$  nor  $AVDO_2$  was changed by either infusion of tirilazad mesylate or placebo.

The shape of the CBF/ $P_{aCO_2}$  relationship has been described as an S-form curve with the steepest slope between 25–60 mmHg. According to Olesen *et al.*,<sup>23</sup> the relationship between CBF and  $P_{aCO_2}$  is exponential in this interval. However, there is no uniformity of opinion on the relationship with regard to this physiologic range.<sup>15</sup> Therefore, we choose to use both linear and exponential calculations (the correlation of  $P_{aCO_2}$  with both  $1/AVDO_2$  and  $\log 1/AVDO_2$ ) and use the best-fitting curve.

The reproducibility, in normal volunteers, of the method of  $^{133}Xe$  inhalation used has been studied with a CBF measurement and three remeasurements within 1 day. No CBF fluctuations occurred during the 3-h observation period.<sup>24</sup> One might object that the carbon dioxide manipulations in the first part of the study could influence the second part (*e.g.*, inducing a certain degree of hyperemia). Because, however, 1 h separated the two parts of the study, this is not likely. The similar CBF measured by SPECT before and after placebo confirms this.

The results of the current study show that tirilazad mesylate does not influence CBF,  $CMR_{O_2}$ , or the cerebrovascular carbon dioxide reactivity. However, the small number of volunteers in the two groups implies a relatively low power ( $1-\beta$ ) of the statistical test. Given an influence of tirilazad mesylate on CBF of 30%, or on the carbon dioxide reactivity of 20%, the power would be about 90%. Thus, effects of a magnitude with clinical relevance, in all likelihood, would be revealed by the current study, whereas the number of volunteers is not sufficient to find minor effects of tirilazad mesylate.

The reduction in CBF that occurs in response to hypocapnia is used to decrease intracranial pressure during surgery and in the intensive care unit. Accordingly, the impact of drugs on the cerebrovascular carbon dioxide reactivity has important implications when used in these situations. A nonstimulating effect on the cerebral metabolism is also essential for a drug used in neurointensive care as a treatment of cerebral ischemia. The results obtained in the current study, how-

## Olesen J: Thesis: Cerebral blood flow: Methods for measurement, regulation, effects of drugs, and changes in disease. Copenhagen, FADL Publishing Compagny, 1974, pp 13–14.

TIRILAZAD MESYLATE AND CBF,  $\text{CMR}_{\text{O}_2}$ , OR  $\text{CO}_2$  REACTIVITY

ever, may not be the same as in a study of patients with injuries of the brain and spinal cord, ischemic cerebrovascular disease, or cerebral ischemia, and further studies are needed to determine whether tirilazad mesylate has a therapeutic role in these categories of patients.

We conclude that tirilazad mesylate, administered to healthy volunteers, has no major effect on global or regional CBF,  $\text{CMR}_{\text{O}_2}$ , or the reactivity of the cerebral vessels to changes in  $\text{PaCO}_2$ .

The authors wish to thank the laboratory assistants Gerda Thomsen, Glenna Skovboe, and Pia Tejmer, for their excellent assistance.

## References

- Halliwell B: Reactive oxygen species and the central nervous system. *J Neurochem* 59:1609-1623, 1992
- Braugher JM, Hall ED: Central nervous system trauma and stroke: I. Biochemical considerations for oxygen radical formation and lipid peroxidation. *Free Radic Biol Med* 6:289-301, 1989
- Braugher JM, Pregenzer JF, Chase RL, Duncan LA, Jacobsen EJ, McCall JM: Novel 21-aminosteroids as potent inhibitors of iron-dependent lipid peroxidation. *J Biol Chem* 262:10438-10440, 1989
- Braugher JM, Chase RL, Neft GL, Yonkers PA, Day JS, Hall ED, Sethy VH, Lahti RA: A new 21-aminosteroid antioxidant lacking glucocorticoid activity blocks arachidonic acid release and stimulates ACTH secretion from mouse pituitary tumor. *J Pharmacol Exp Ther* 244:423-427, 1988
- Zuccarello M, Marsch JT, Schmitt G, Woodward J, Anderson DK: Effect of the 21-aminosteroid U-74006F on cerebral vasospasm following subarachnoid hemorrhage. *J Neurosurg* 71:98-104, 1989
- Steinke DE, Weir BK, Findlay JM, Tanabe T, Grace M, Krushelnycky BW: A trial of the 21-aminosteroid U74006F in a primate model of chronic cerebral vasospasm. *Neurosurgery* 24:179-186, 1989
- Natale JE, Schott RJ, Hall ED, Braugher JM, D'Alecy LG: The 21-aminosteroid U74006F reduces systemic lipid peroxidation, improves neurologic function, and reduces mortality after cardiopulmonary arrest in dogs. *Prog Clin Biol Res* 308:891-896, 1989
- Murkin JM, Farrer JK, Tweed WA, McKenzie FN, Guiraudon G: Cerebral autoregulation and flow/metabolism coupling during cardiopulmonary bypass: The influence of  $\text{PaCO}_2$ . *Anesth Analg* 66:825-832, 1987
- Celsis P, Goldman T, Henriksen L, Lassen NA: A method for calculating regional cerebral blood flow from emission computed tomography of inert gas concentration. *J Comput Assist Tomogr* 5:641-645, 1981
- Stokely EM, Sveinsdottir E, Lassen NA, Rommer PA: Single photon dynamic computer assisted tomography (DCAT) for imaging brain function in multiple cross sections. *J Comput Assist Tomogr* 4:230-240, 1980
- Kanno I, Lassen NA: Two methods for calculating cerebral blood flow from emission computed tomography of inert gas concentration. *J Comput Assist Tomogr* 3:71-76, 1979
- Vorstrup SE, Lassen NA, Henriksen L, Haase J, Lindewald H, Boysen G, Paulson OB: CBF before and after extracranial bypass surgery in patients with ischemic cerebrovascular disease studied with  $^{133}\text{Xe}$ -inhalation tomography. *Stroke* 16:616-626, 1985
- Schmidt JF, Waldemar G, Vorstrup S, Andersen AR, Gjerris F, Paulson OB: Computerized analysis of cerebral blood flow autoregulation in humans: Validation of a method for pharmacological studies. *J Cardiovasc Pharmacol* 15:983-988, 1990
- Lassen NA: Cerebral blood flow and oxygen consumption in man. *Physiol Rev* 39:138-238, 1959
- Edvinsson L, MacKenzie ET, McCulloch J: Cerebral blood flow and metabolism. New York, Raven Press, 1993, pp 538-539
- Wasserman AJ, Patterson JL: The cerebral vascular response to reduction in arterial carbon dioxide tension. *J Clin Invest* 40:1297-303, 1961
- Kety SS, Schmidt CF: The effect of altered arterial tension of carbon dioxide and oxygen on cerebral blood flow and cerebral oxygen consumption of normal young men. *J Clin Invest* 27:484-491, 1948
- Alexander SC, Cohen PJ, Wollman H, Smith TC, Reivich M, Van der Molen RA: Cerebral carbohydrate metabolism during hypocarbia in man: Studies during bitrous oxide anesthesia. *ANESTHESIOLOGY* 26:624-632, 1964
- Wollman H, Alexander SC, Cohen PJ, Smith TC, Chase PE, Van der Molen RA: Cerebral circulation during anesthesia and hyperventilation in man. *J Appl Physiol* 24:60-65, 1965
- Novack P, Shenkin HA, Bortin B, Goluboff B, Soffe AM: The effects of carbon dioxide inhalation upon the cerebral blood flow and cerebral oxygen consumption in vascular disease. *J Clin Invest* 32:696-702, 1953
- Cohen PJ, Wollman H, Alexander SC: Cerebral carbohydrate metabolism in man during halothane anesthesia. *ANESTHESIOLOGY* 25:185-191, 1964
- Siesjö BK: Brain Energy Metabolism. New York, John Wiley & Sons, 1978, p 290
- Olesen J, Paulson OB, Lassen NA: Regional cerebral blood flow in man determined by the initial slope of the clearance of intraarterially injected  $^{133}\text{Xe}$ . *Stroke* 2:519-540, 1971
- Vorstrup S: Tomographic cerebral blood flow measurements in patients with ischemic cerebrovascular disease and evaluation of the vasodilatory capacity by the acetazolamide test. *Acta Neurol Scand* 77(suppl 114):1-48, 1988
